# Supplementary material for: Mutation of Arabidopsis HY1 causes UV-C hypersensitivity by impairing carotenoid and flavonoid biosynthesis and the down-regulation of antioxidant defence
Source: PubMed Central journal article supplement — J Exp Bot. 2012 Mar 14;63(10):3869–83. doi: 10.1093/jxb/ers078 (PMC3388838; doi:10.1093/jxb/ers078), 2012-03-14
Supplement: supp_ers078_00073031-file001.pdf [file supp_ers078_00073031-file001.pdf]

**Mutation of Arabidopsis HY1 causes UV-C hypersensitivity by impairing carotenoid and flavonoid biosynthesis and the down-regulation of antioxidant defence** . Yanjie Xie, Daokun Xu, Weiti Cui, and Wenbiao Shen.

## SUPPLEMENTARY DATA

**Supplementary Table S1.** The sequences of PCR primers for genotyping.

| Primer name           | Sequences (5' → 3')   |
|-----------------------|-----------------------|
| <i>SALK_025840-LP</i> | GGAAGAACAAGCAGGAGAA   |
| <i>SALK_025840-RP</i> | TTAGCAACTGGTGGGAATGA  |
| <i>SALK_034321-LP</i> | GACTCAAAAGGTCAATCACA  |
| <i>SALK_034321-RP</i> | TTTTACAGCAAGATAGCCAC  |
| <i>SALK_044934-LP</i> | ATTGCAGTTTGCGTGTCTATT |
| <i>SALK_044934-RP</i> | GTTCTTTCTCCGATTTCTCCT |
| <i>Lb1.3</i>          | ATTTTGCCGATTTTCGGAAC  |

**Supplementary Table S2.** The sequences of PCR primers for real-time RT-PCR.

| Primer name   | Sequences (5'→3')            |
|---------------|------------------------------|
| <i>HY1-F</i>  | CGTCCTGTTGCTAAATG            |
| <i>HY1-R</i>  | TTCCAGCCCCGTGTTCT            |
| <i>HO-2-F</i> | TTGCGGTTATGGTGGGTATC         |
| <i>HO-2-R</i> | TCCCGACTCCAGTGCTCC           |
| <i>HO-3-F</i> | CCACTTTCCAGCGAGCACA          |
| <i>HO-3-R</i> | ATAGCCGCCGAGTCAC             |
| <i>HO-4-F</i> | TCTTGCCGCTTTCCTGC            |
| <i>HO-4-R</i> | GCTGCTGCCACAACATTC           |
| <i>GPS-F</i>  | AGTATGGGAGGAATCTGGGTTT       |
| <i>GPS-R</i>  | ACTCTTCCATGGCAAAGAGGAT       |
| <i>PSY-F</i>  | GACACCCGAAAGGCCGAAAGG        |
| <i>PSY-R</i>  | CAGCGAGAGCAGCATCAAGC         |
| <i>PDS1-F</i> | AAGTAGAAGACGCAGAGTCA         |
| <i>PDS1-R</i> | ATCAGAGCCAGATGTTGTAG         |
| <i>ZDS-F</i>  | AGATAGAGGTGGCAGAATCC         |
| <i>ZDS-R</i>  | GGTGTTAGAACGCACTGAAG         |
| <i>CHS-F</i>  | GGCTCAGAGAGCTGATGGAC         |
| <i>CHS-R</i>  | CGTTTCCGAATTGTCGACTT         |
| <i>CHI-F</i>  | TCAAACCTGGGAACTACGTCTCTCGT   |
| <i>CHI-R</i>  | ATTTCCAACCTGAAGAAGCGGCGG     |
| <i>F3H-F</i>  | GACAAAAACATCATACTCCACCTGT    |
| <i>F3H-R</i>  | CCAACAATGTATGTATGCCACTG      |
| <i>FLS-F</i>  | GGGATTCTCTCGGATGGATT         |
| <i>FLS-R</i>  | TGAGCCGGTACACCTAAAGC         |
| <i>HY5-F</i>  | CAGGCGACTGTCCGAGAAAGTCAAAGG  |
| <i>HY5-R</i>  | TCAACAACCTCTTCAGCCGCTTGTTCTC |

|                   |                            |
|-------------------|----------------------------|
| <i>HYH-F</i>      | GCCTCAAGAGATTATTGAGGA      |
| <i>HYH-R</i>      | CTCTTGATTCCAAATCACTCAC     |
| <i>MYB11-F</i>    | CCCAAAAATGCCGGGCTAAAGAGATG |
| <i>MYB11-R</i>    | CTTCTTCGGGAGTTATGTTT       |
| <i>MYB12-F</i>    | CACTTTGGGAAACAGGTGGTCACT   |
| <i>MYB12-R</i>    | GTTGTGGAGTTTACGGCTGA       |
| <i>CSD1-F</i>     | TGATGGAACTGCCACCTTCACA     |
| <i>CSD1--R</i>    | ATGGCCTCCCTTTCCGAGGT       |
| <i>CAT1-F</i>     | CGCCATGCCGAAAATACCC        |
| <i>CAT1-R</i>     | CTTGCCTGTCTGAATCCCAGGAC    |
| <i>CAT2-F</i>     | TCCGCCTGCTGTCTGTTCTG       |
| <i>CAT2-R</i>     | TGGGTCGGATAGGGCATCAA       |
| <i>FSD1-F</i>     | GCTCGGCTCTTTCCCATTGC       |
| <i>FSD1-R</i>     | CAGCTTCCCAAGACACAAGATTGG   |
| <i>cAPX1-F</i>    | ACTCTGGGACGATGCCACAAG      |
| <i>cAPX1-R</i>    | TCTCGACCAAAGGACGGAAAA      |
| <i>cAPX2-F</i>    | TGGTCGGATGGGACTCAAT        |
| <i>cAPX2-R</i>    | AAGAGCCTTGTCGGTTGGT        |
| <i>actin2/7-F</i> | TCGTTTCGCTTTCCTTAG         |
| <i>actin2/7-R</i> | CTTCACCATTCCAGTTCC         |

**Figure S1.**

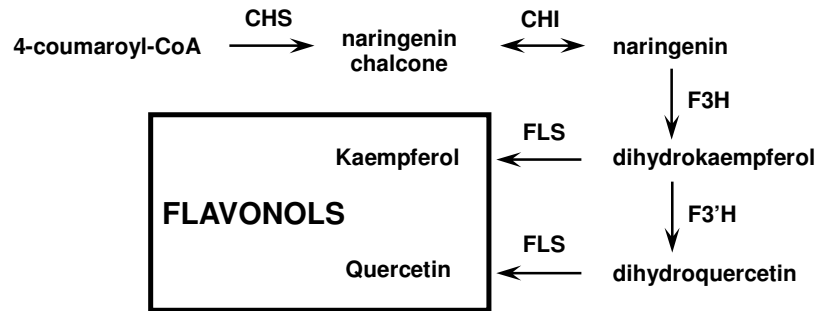

**Figure S1.** Scheme of the flavonoid biosynthetic pathway in *Arabidopsis* (Qin *et al.*

2007; Buer *et al.* 2010; Castells *et al.* 2010).

**Figure S2.**

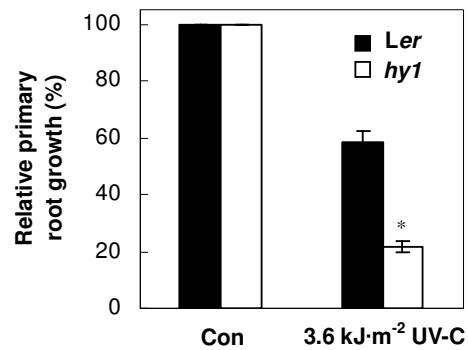

**Figure S2.** Primary root growth of wild-type (*Ler*) and *hy1* mutant seedlings in response to 3.6 kJ·m<sup>-2</sup> UV-C irradiation. After exposed to 3.6 kJ·m<sup>-2</sup> UV-C and then transferred to normal growth condition for 5 days, primary root growth rate of each ecotype was measured, taking growth rate of each ecotype grown under MS medium (Con) as 100% (a). Data were means  $\pm$  SE from three independent experiments. Bars with an asterisk were significantly different in comparison with the wild-type at  $P < 0.05$  according to the *t*-test.

**Figure S3.**

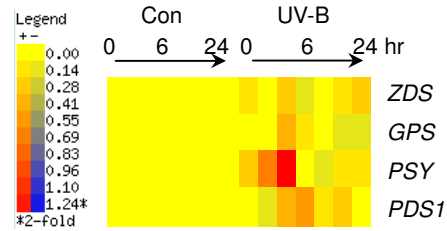

**Figure S3.** Representation of carotenoid biosynthetic genes in Arabidopsis seedling root tissues upon UV-B irradiation. The data were from microarray analyses from AtGenExpress-UV-B Stress. Left bar: induction scale. The experimental details can be accessed at the Botany Array Resource database (Toufighi *et al.*, 2005; [http://www.bar.utoronto.ca/affydb/cgi-bin/affy\\_db\\_exprss\\_browser\\_in.cgi?pub=&data set=atgenexp\\_stress](http://www.bar.utoronto.ca/affydb/cgi-bin/affy_db_exprss_browser_in.cgi?pub=&data set=atgenexp_stress)).

**Figure S4.**

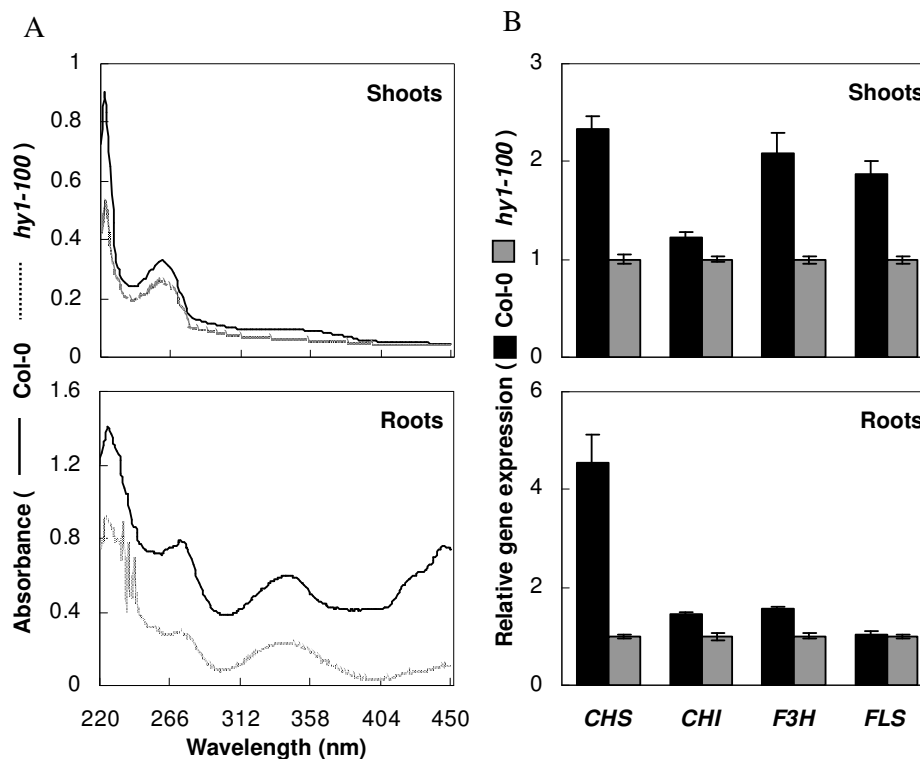

**Figure S4.** The *hy1-100* mutant under-produces UV-absorbing compounds. Profile of UV-absorbing compounds in shoot and root tissues of wild-type and the *hy1-100* mutant (A). Soluble pigments were methanol-extracted from equal amounts of fresh material and the absorbance was scanned from 220-450 nm. qRT-PCR analysis of genes, including *Chalcone Synthase* (*CHS*; At5g13930), *Chalcone Isomerase* (*CHI*; At3g55120), *Flavonol 3-Hydroxylase* (*F3H*; At3g51240), and *Flavonol Synthase* (*FLS*; At5g08640), encoding representative enzymes of the flavonoid biosynthetic pathway in wild-type and *hy1-100* mutant shoot and root tissues (B). Data were means  $\pm$  SE from three independent experiments. For each gene, the transcript levels in the *hy1-100* mutant were arbitrarily set to 1.

**Figure S5.**

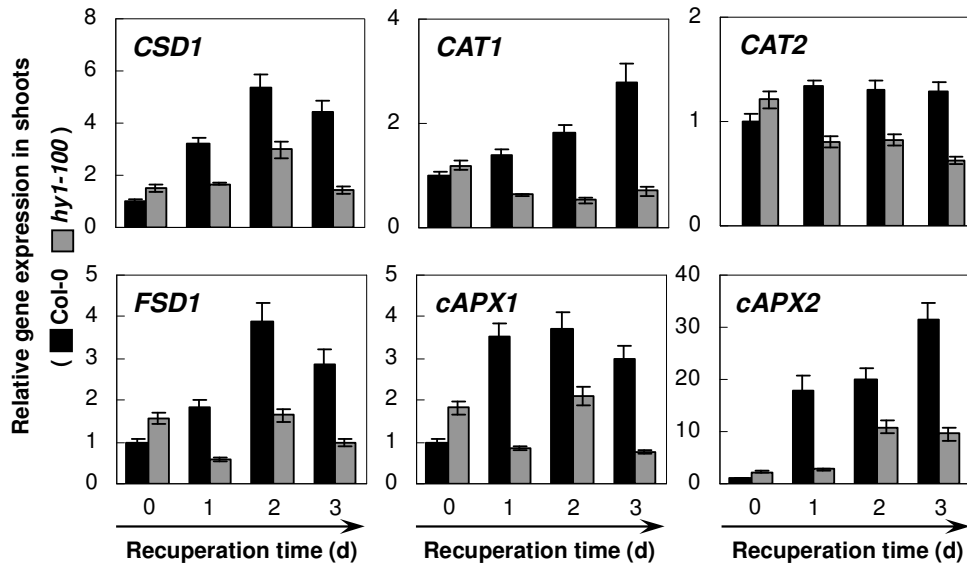

**Figure S5.** Effects of  $3.6 \text{ kJ}\cdot\text{m}^{-2}$  UV-C on antioxidant defence genes expression. After UV-C irradiation, 5-d-old seedlings of wild-type and the *hy1-100* mutant were recuperated under normal growth condition, and transcript levels of *Copper/zinc Superoxide Dismutase* (*CSD1*; At1g08830), *Catalase1* (*CAT1*; At1g20630), *Ccatalase2* (*CAT2*; At4g35090); *Fe Superoxide Dismutase1* (*FSD1*; At4g25100), *cytosolic Ascorbate Peroxidase1* (*cAPX1*; At1g07890); and *cytosolic Ascorbate Peroxidase2* (*cAPX2*; At3g09640) of shoot tissues of each ecotype were analyzed by real-time PCR at the indicated times. Expression levels of each gene were presented relative to Col-0 samples at 0 d. Data were means  $\pm$  SE from four independent experiments.
